# Supplementary material
Source: PubMed Central journal article supplement (PMC5735035)
Supplement: NIHMS904398-supplement-Supp_TableS1-4.pdf [file NIHMS904398-supplement-Supp_TableS1-4.pdf]

# AMPATH Analysis Markov Assumption Check, from Engaged

April 24, 2017

Model used here is multinomial logistic regression. The reference group of all models is **to engaged**.

*age* is dichotomized. Reference group is  $age \leq 35$ .

*male* is a binary variable with gender male = 1.

The reference group of cd4 arv variable is  $cd4 < 350$  and *arv-* (not on arv).

Calendar year and grid time are added in the model as smoothing lines.

Reported values are relative risk ratio (rrr). gam function in R package mgcv is used for fitting the model.

Table 1: Markov Assumption Check, From Eng, cd4 350

| Model            | Variable           | rrr   | 2.5%  | 97.5% | Estimate | Std. Error | Pr(> z ) |
|------------------|--------------------|-------|-------|-------|----------|------------|----------|
| To: Dis1         | (Intercept)        | 1.1   | 1.037 | 1.166 | 0.095    | 0.03       | 0.001    |
|                  | ageGreaterThan35   | 0.623 | 0.606 | 0.642 | -0.472   | 0.015      | 0        |
|                  | male               | 1.097 | 1.064 | 1.131 | 0.093    | 0.015      | 0        |
|                  | cd4art1            | 0.144 | 0.136 | 0.152 | -1.938   | 0.029      | 0        |
|                  | cd4art2            | 0.279 | 0.263 | 0.297 | -1.275   | 0.031      | 0        |
|                  | cd4art3            | 0.106 | 0.1   | 0.112 | -2.246   | 0.031      | 0        |
|                  | cd4art4            | 1.845 | 1.677 | 2.031 | 0.613    | 0.049      | 0        |
|                  | cd4art5            | 0.298 | 0.276 | 0.321 | -1.211   | 0.038      | 0        |
|                  | cd4350_2>=350      | 0.927 | 0.886 | 0.971 | -0.075   | 0.024      | 0.001    |
|                  | cd4350_2missing    | 0.934 | 0.889 | 0.981 | -0.068   | 0.025      | 0.006    |
| To: Transfer Out | (Intercept).1      | 0.049 | 0.038 | 0.062 | -3.02    | 0.121      | 0        |
|                  | ageGreaterThan35.1 | 0.571 | 0.508 | 0.64  | -0.561   | 0.059      | 0        |
|                  | male.1             | 0.865 | 0.762 | 0.983 | -0.145   | 0.065      | 0.026    |
|                  | cd4art1.1          | 0.244 | 0.193 | 0.309 | -1.411   | 0.12       | 0        |
|                  | cd4art2.1          | 0.219 | 0.165 | 0.29  | -1.52    | 0.144      | 0        |
|                  | cd4art3.1          | 0.164 | 0.128 | 0.21  | -1.809   | 0.127      | 0        |
|                  | cd4art4.1          | 1.977 | 1.333 | 2.933 | 0.682    | 0.201      | 0.001    |
|                  | cd4art5.1          | 0.606 | 0.437 | 0.842 | -0.5     | 0.168      | 0.003    |
|                  | cd4350_2>=350.1    | 0.946 | 0.784 | 1.142 | -0.055   | 0.096      | 0.564    |
|                  | cd4350_2missing.1  | 0.654 | 0.519 | 0.825 | -0.424   | 0.118      | 0        |
| To: Death        | (Intercept).2      | 0.014 | 0.011 | 0.017 | -4.292   | 0.123      | 0        |
|                  | ageGreaterThan35.2 | 1.02  | 0.91  | 1.144 | 0.02     | 0.058      | 0.732    |
|                  | male.2             | 1.562 | 1.405 | 1.736 | 0.446    | 0.054      | 0        |
|                  | cd4art1.2          | 0.679 | 0.545 | 0.845 | -0.388   | 0.112      | 0.001    |
|                  | cd4art2.2          | 0.194 | 0.143 | 0.264 | -1.638   | 0.156      | 0        |
|                  | cd4art3.2          | 0.227 | 0.176 | 0.292 | -1.483   | 0.129      | 0        |
|                  | cd4art4.2          | 1.105 | 0.726 | 1.681 | 0.099    | 0.214      | 0.642    |
|                  | cd4art5.2          | 0.688 | 0.505 | 0.937 | -0.374   | 0.158      | 0.018    |
|                  | cd4350_2>=350.2    | 0.951 | 0.798 | 1.133 | -0.051   | 0.089      | 0.571    |
|                  | cd4350_2missing.2  | 1.294 | 1.097 | 1.525 | 0.257    | 0.084      | 0.002    |

Table 2: Markov Assumption Check, From Eng, onarvcf

| Model              | Variable           | rrr           | 2.5%  | 97.5% | Estimate | Std. Error | Pr(> z ) |
|--------------------|--------------------|---------------|-------|-------|----------|------------|----------|
| To: Dis1           | (Intercept)        | 1.009         | 0.955 | 1.067 | 0.009    | 0.028      | 0.743    |
|                    | ageGreaterThan35   | 0.625         | 0.607 | 0.643 | -0.471   | 0.015      | 0        |
|                    | male               | 1.1           | 1.067 | 1.134 | 0.095    | 0.015      | 0        |
|                    | cd4art1            | 0.136         | 0.129 | 0.145 | -1.992   | 0.03       | 0        |
|                    | cd4art2            | 0.275         | 0.259 | 0.291 | -1.292   | 0.03       | 0        |
|                    | cd4art3            | 0.095         | 0.09  | 0.101 | -2.35    | 0.032      | 0        |
|                    | cd4art4            | 1.786         | 1.627 | 1.96  | 0.58     | 0.047      | 0        |
|                    | cd4art5            | 0.268         | 0.249 | 0.288 | -1.318   | 0.037      | 0        |
|                    | onarvcf_21         | 1.182         | 1.134 | 1.232 | 0.167    | 0.021      | 0        |
|                    | To: Transfer Out   | (Intercept).1 | 0.037 | 0.03  | 0.047    | -3.292     | 0.116    |
| ageGreaterThan35.1 |                    | 0.573         | 0.51  | 0.643 | -0.557   | 0.059      | 0        |
| male.1             |                    | 0.869         | 0.765 | 0.987 | -0.141   | 0.065      | 0.031    |
| cd4art1.1          |                    | 0.18          | 0.14  | 0.231 | -1.717   | 0.127      | 0        |
| cd4art2.1          |                    | 0.232         | 0.177 | 0.303 | -1.462   | 0.137      | 0        |
| cd4art3.1          |                    | 0.115         | 0.089 | 0.15  | -2.16    | 0.133      | 0        |
| cd4art4.1          |                    | 1.495         | 1.035 | 2.158 | 0.402    | 0.187      | 0.032    |
| cd4art5.1          |                    | 0.317         | 0.233 | 0.43  | -1.15    | 0.156      | 0        |
| onarvcf_21.1       |                    | 1.958         | 1.631 | 2.349 | 0.672    | 0.093      | 0        |
| To: Death          |                    | (Intercept).2 | 0.014 | 0.011 | 0.018    | -4.24      | 0.12     |
|                    | ageGreaterThan35.2 | 1.017         | 0.907 | 1.14  | 0.017    | 0.058      | 0.774    |
|                    | male.2             | 1.566         | 1.409 | 1.741 | 0.449    | 0.054      | 0        |
|                    | cd4art1.2          | 0.679         | 0.542 | 0.85  | -0.387   | 0.115      | 0.001    |
|                    | cd4art2.2          | 0.188         | 0.139 | 0.253 | -1.673   | 0.152      | 0        |
|                    | cd4art3.2          | 0.221         | 0.171 | 0.284 | -1.511   | 0.13       | 0        |
|                    | cd4art4.2          | 1.261         | 0.833 | 1.907 | 0.232    | 0.211      | 0.273    |
|                    | cd4art5.2          | 0.812         | 0.601 | 1.096 | -0.209   | 0.153      | 0.174    |
|                    | onarvcf_21.2       | 0.979         | 0.839 | 1.142 | -0.021   | 0.079      | 0.785    |

Table 3: Markov Assumption Check, From Eng, engaged 0/1

| Model            | Variable           | rrr   | 2.5%  | 97.5% | Estimate | Std. Error | Pr(> z ) |
|------------------|--------------------|-------|-------|-------|----------|------------|----------|
| To: Dis1         | (Intercept)        | 3.686 | 3.412 | 3.982 | 1.305    | 0.039      | 0        |
|                  | ageGreaterThan35   | 0.637 | 0.619 | 0.655 | -0.452   | 0.015      | 0        |
|                  | male               | 1.089 | 1.056 | 1.122 | 0.085    | 0.015      | 0        |
|                  | cd4art1            | 0.154 | 0.146 | 0.163 | -1.871   | 0.028      | 0        |
|                  | cd4art2            | 0.283 | 0.267 | 0.3   | -1.263   | 0.03       | 0        |
|                  | cd4art3            | 0.112 | 0.106 | 0.119 | -2.189   | 0.03       | 0        |
|                  | cd4art4            | 1.765 | 1.608 | 1.937 | 0.568    | 0.047      | 0        |
|                  | cd4art5            | 0.275 | 0.256 | 0.295 | -1.292   | 0.036      | 0        |
|                  | eng_2              | 0.252 | 0.237 | 0.268 | -1.378   | 0.031      | 0        |
| To: Transfer Out | (Intercept).1      | 0.081 | 0.058 | 0.112 | -2.515   | 0.166      | 0        |
|                  | ageGreaterThan35.1 | 0.579 | 0.516 | 0.65  | -0.547   | 0.059      | 0        |
|                  | male.1             | 0.862 | 0.759 | 0.98  | -0.148   | 0.065      | 0.023    |
|                  | cd4art1.1          | 0.259 | 0.206 | 0.325 | -1.352   | 0.116      | 0        |
|                  | cd4art2.1          | 0.221 | 0.169 | 0.289 | -1.511   | 0.137      | 0        |
|                  | cd4art3.1          | 0.17  | 0.134 | 0.216 | -1.774   | 0.122      | 0        |
|                  | cd4art4.1          | 1.54  | 1.066 | 2.224 | 0.432    | 0.188      | 0.021    |
|                  | cd4art5.1          | 0.445 | 0.334 | 0.592 | -0.81    | 0.146      | 0        |
|                  | eng_2.1            | 0.522 | 0.401 | 0.679 | -0.65    | 0.134      | 0        |
| To: Death        | (Intercept).2      | 0.03  | 0.021 | 0.041 | -3.521   | 0.167      | 0        |
|                  | ageGreaterThan35.2 | 1.027 | 0.916 | 1.151 | 0.026    | 0.058      | 0.65     |
|                  | male.2             | 1.56  | 1.403 | 1.734 | 0.445    | 0.054      | 0        |
|                  | cd4art1.2          | 0.692 | 0.557 | 0.86  | -0.368   | 0.111      | 0.001    |
|                  | cd4art2.2          | 0.193 | 0.143 | 0.26  | -1.646   | 0.152      | 0        |
|                  | cd4art3.2          | 0.228 | 0.178 | 0.292 | -1.478   | 0.126      | 0        |
|                  | cd4art4.2          | 1.242 | 0.821 | 1.879 | 0.217    | 0.211      | 0.304    |
|                  | cd4art5.2          | 0.78  | 0.581 | 1.046 | -0.249   | 0.15       | 0.097    |
|                  | eng_2.2            | 0.456 | 0.353 | 0.589 | -0.786   | 0.131      | 0        |

Table 4: Markov Assumption Check, From Eng, state\_2

| Model            | Variable           | rrr   | 2.5%  | 97.5% | Estimate | Std. Error | Pr(> z ) |
|------------------|--------------------|-------|-------|-------|----------|------------|----------|
| To: Dis1         | (Intercept)        | 0.926 | 0.877 | 0.978 | -0.077   | 0.028      | 0.006    |
|                  | ageGreaterThan35   | 0.637 | 0.619 | 0.656 | -0.451   | 0.015      | 0        |
|                  | male               | 1.089 | 1.056 | 1.122 | 0.085    | 0.015      | 0        |
|                  | cd4art1            | 0.154 | 0.146 | 0.163 | -1.869   | 0.028      | 0        |
|                  | cd4art2            | 0.283 | 0.267 | 0.301 | -1.261   | 0.03       | 0        |
|                  | cd4art3            | 0.113 | 0.106 | 0.119 | -2.185   | 0.03       | 0        |
|                  | cd4art4            | 1.763 | 1.606 | 1.935 | 0.567    | 0.047      | 0        |
|                  | cd4art5            | 0.273 | 0.255 | 0.293 | -1.297   | 0.036      | 0        |
|                  | state_221          | 3.462 | 3.18  | 3.769 | 1.242    | 0.043      | 0        |
|                  | state_222          | 4.017 | 3.515 | 4.591 | 1.391    | 0.068      | 0        |
| state_223        | 4.904              | 4.418 | 5.444 | 1.59  | 0.053    | 0          |          |
| To: Transfer Out | (Intercept).1      | 0.042 | 0.034 | 0.053 | -3.167   | 0.113      | 0        |
|                  | ageGreaterThan35.1 | 0.579 | 0.516 | 0.65  | -0.546   | 0.059      | 0        |
|                  | male.1             | 0.862 | 0.759 | 0.98  | -0.148   | 0.065      | 0.023    |
|                  | cd4art1.1          | 0.259 | 0.206 | 0.325 | -1.351   | 0.116      | 0        |
|                  | cd4art2.1          | 0.221 | 0.169 | 0.289 | -1.51    | 0.137      | 0        |
|                  | cd4art3.1          | 0.17  | 0.134 | 0.216 | -1.772   | 0.122      | 0        |
|                  | cd4art4.1          | 1.538 | 1.065 | 2.222 | 0.431    | 0.188      | 0.022    |
|                  | cd4art5.1          | 0.443 | 0.333 | 0.589 | -0.814   | 0.146      | 0        |
|                  | state_221.1        | 1.732 | 1.184 | 2.532 | 0.549    | 0.194      | 0.005    |
|                  | state_222.1        | 1.736 | 0.951 | 3.17  | 0.551    | 0.307      | 0.073    |
| state_223.1      | 2.354              | 1.537 | 3.606 | 0.856 | 0.218    | 0          |          |
| To: Death        | (Intercept).2      | 0.013 | 0.011 | 0.017 | -4.315   | 0.118      | 0        |
|                  | ageGreaterThan35.2 | 1.028 | 0.917 | 1.153 | 0.028    | 0.058      | 0.63     |
|                  | male.2             | 1.56  | 1.404 | 1.734 | 0.445    | 0.054      | 0        |
|                  | cd4art1.2          | 0.695 | 0.56  | 0.863 | -0.364   | 0.111      | 0.001    |
|                  | cd4art2.2          | 0.193 | 0.144 | 0.26  | -1.643   | 0.152      | 0        |
|                  | cd4art3.2          | 0.23  | 0.18  | 0.294 | -1.47    | 0.126      | 0        |
|                  | cd4art4.2          | 1.239 | 0.82  | 1.875 | 0.215    | 0.211      | 0.309    |
|                  | cd4art5.2          | 0.769 | 0.573 | 1.032 | -0.263   | 0.15       | 0.08     |
|                  | state_221.2        | 1.551 | 1.046 | 2.3   | 0.439    | 0.201      | 0.029    |
|                  | state_222.2        | 2.054 | 1.152 | 3.662 | 0.72     | 0.295      | 0.015    |
| state_223.2      | 3.743              | 2.531 | 5.537 | 1.32  | 0.2      | 0          |          |
